## MODULATION OF SCREENING-PIGMENT POSITION IN CRAYFISH PHOTORECEPTORS BY SEROTONIN: POSSIBLE INVOLVEMENT OF $\text{Na}^+/\text{K}^+$ -ATPase ACTIVITY

BY EUGENIO FRIXIONE AND JORGE HERNÁNDEZ

*Departamento de Biología Celular and Departamento de Fisiología, Biofísica y Neurociencias, Centro de Investigación y de Estudios Avanzados del IPN, Apartado Postal 14-740, México, DF 07000 Mexico*

*Accepted 4 January 1989*

### Summary

The possibility that serotonin might play a role in the modulation of screening-pigment position in crayfish photoreceptors was explored through experiments with isolated eyes and a membrane fraction from retinal homogenates. In the isolated eye serotonin ( $\geq 10^{-4}$  mol l<sup>-1</sup>) and some of its agonists exerted a limited dark-adapting influence over the pigment position, irrespective of the presence or absence of light, and this effect was abolished by the simultaneous addition of serotonin antagonists. In the retinal membrane fraction serotonin and quipazine produced a methysergide-sensitive stimulation of the  $\text{Na}^+/\text{K}^+$ -ATPase activity. These results are interpreted in terms of a serotonin-mediated efferent input on the photoreceptors, which would affect the ionic regulation of the pigment transport mechanisms.

### Introduction

The migrations of screening-pigment granules within the photoreceptor cells of compound eyes have long been recognized as a major feature in the visual physiology of arthropods (see Parker, 1932). Shifts in pigment position can influence the absolute and spectral sensitivities of the photoreceptors, as well as their angle of acceptance for incident light rays and, therefore, the spatial resolution of the retina (for reviews see Miller, 1979; Stavenga, 1979; Rao, 1985). In the past decade several studies have investigated the mechanisms involved in both the translocation of the pigment particles (Miller, 1975; Frixione *et al.* 1979; Frixione, 1983*a,b*) and the coupling of photoreceptor excitation with pigment migration (Olivo & Larsen, 1978; Kirschfeld & Vogt, 1980; Frixione & Aréchiga, 1981; Frixione & Ruiz, 1988). Although the current picture of the processes that mediate the light-dependent migrations of the screening pigment is far from complete, even less is known about the mechanisms that participate in the light-independent pigment movements observed in the photoreceptors of some species.

The occurrence of regular pigment migrations unrelated to illumination in

**Key words:** crustaceans, photoreceptors, pigment migration, serotonin,  $\text{Na}^+/\text{K}^+$ -ATPase.

arthropod photoreceptors was first documented for crustaceans. Crayfish kept in the dark for several days displayed partial pigment dispersion during the daytime and full pigment aggregation at night (Bennitt, 1932). Although this apparently spontaneous behaviour of the pigment could be ascribed to a circadian rhythmicity of the photoreceptor itself, various observations suggest that it might rather be the result of efferent modulation in which serotonin could play a significant role. First, isolated eyes incubated in constant darkness show the retinal pigments in a fixed position, despite a clear circadian rhythm in the amplitude of the electroretinogram (Sánchez & Fuentes-Pardo, 1977), and even though the excised retinas retain the capability of achieving at least one full cycle of pigment migration – i.e. a complete aggregation followed by a complete dispersion – in response to darkness and illumination (Frixione *et al.* 1979). Second, the levels of serotonin in some crustacean eyestalks undergo circadian variations with a large increase during the evening hours (Fingerman & Fingerman, 1977), when pigment migration to the dark-adapted position normally takes place, and injection of exogenous serotonin into the eyes of a closely related arthropod greatly enhances their sensitivity to light (Barlow *et al.* 1977). Third, serotonin-like immunoreactivity is prominent in three of the four optic ganglia located in crayfish eyestalks (Elofsson, 1983), and can be traced in fibres closely associated with the photoreceptor axons in the first optic ganglion (H. Aréchiga, E. Bañuelos, E. Frixione, A. Picones & L. Rodríguez-Sosa, unpublished results). Fourth, a number of findings point to serotonin as a key wide-spectrum neuromodulator in crustaceans (Beltz & Kravitz, 1986). Fifth, serotonin appears to be a circadian modulator in the visual systems of other invertebrates (Nadakavukaren *et al.* 1986), as well as in those of some vertebrates (Dearry & Burnside, 1986).

In this paper we report experiments with isolated eyes of the crayfish incubated in the presence of serotonin and serotonergic agonists and antagonists, which confirm an influence of this amine upon pigment positioning within the photoreceptors. In addition, these compounds are shown to affect the  $\text{Na}^+/\text{K}^+$ -ATPase activity in a cellular fraction enriched in photoreceptor membranes. The results are discussed in the context of current views on serotonin as a neuromodulator and on the ionic control of screening-pigment position in arthropod photoreceptors.

## Materials and methods

### *Chemicals*

Serotonin (5-hydroxytryptamine creatinine sulphate, 5-HT), 5-methoxy-*N,N*-dimethyltryptamine (5-MDT), ouabain, pargyline and adenosine 5'-triphosphate (ATP, vanadium-free, catalogue no. A-0270) were purchased from Sigma Chemical Co. (St Louis, MO, USA). Methysergide bimaleate and quipazine maleate were a generous donation of Laboratorios Miles de México, SA. Cyproheptadine hydrochloride was kindly provided by Merck Sharp & Dohme de México, SA.

### *Animals and experiments with isolated eyes*

Adult crayfish of both sexes of the species *Procambarus clarkii* (Girard) were

obtained from specialized collectors and kept in outdoor aquaria under natural illumination. Eystalks excised from these animals were prepared, incubated and fixed by standard procedures described in detail elsewhere (Frixione *et al.* 1979; Frixione & Aréchiga, 1981). Briefly, following dissection the eystalks were secured inside wide-mouthed vials (four to each vial) containing 6 ml of the test solutions and approximately 100 ml of a 95 % O<sub>2</sub> atmosphere. The test solutions containing serotonin and related compounds were made up in imidazole-buffered (pH 7.4) saline for freshwater crustaceans (Van Harreveld, 1936). Incubation was carried out for different intervals under regular fluorescent laboratory illumination, or in total darkness in a photographic room. The temperature was maintained at 18°C throughout the incubation period. At the end of every interval the eyes were fixed by immersion in water at 85°C. Although this traditional technique for fixation of crustacean eystalks is unsuitable for fine histological studies, it still remains the method of choice for an instantaneous arrest of pigment position under any illumination condition, and subsequent measurement under low-magnification optics. The position of the pigment was inspected at 30× with a stereomicroscope in longitudinally bisected retinas, and quantitatively recorded as a proximal-pigment index (PPI) calculated from measurements taken with a micrometer as previously described (Frixione *et al.* 1979; Frixione & Aréchiga, 1981). The PPI may take values from 0.00, when the pigment is completely aggregated in the full dark-adapted state, to 1.00, when it is maximally dispersed in the light-adapted condition.

#### *Preparation of photoreceptor membranes*

The photoreceptor layers from 20 eystalks were dissected out on a cold plate (0–4°C) and homogenized in cold 30 mmol l<sup>-1</sup> Tris-HCl buffer (pH 7.4) with a Teflon pestle glass homogenizer (0.15 mm clearance) operated at 700 rev. min<sup>-1</sup>. The homogenate was centrifuged for 15 min at 600 *g* and the pellet (P-1), in which the bulk of pigment granules accumulated, was discarded. The supernatant (SN-1) was then centrifuged for 10 min at 12 000 *g*, and the second pellet (P-2) was either prepared for electron microscopy, as described below, or resuspended in the same buffer to a final protein concentration of 2 µg µl<sup>-1</sup>, assayed by the method of Lowry *et al.* (1951). Na<sup>+</sup>/K<sup>+</sup>-ATPase activity was recovered predominantly in the P-2 fraction, whereas almost no measurable activity was detected in either the P-1 pellet or the final supernatant (SN-2).

#### *Electron microscopy*

The pellet obtained in the final centrifugation (P-2) was fixed for 2 h in cold 4 % glutaraldehyde made up in 0.1 mol l<sup>-1</sup> sodium cacodylate (pH 7.0), released from the bottom of the tube, and split into small fragments with a razor blade. These pieces were rinsed in cold buffer and post-fixed for 30 min with 1 % osmium tetroxide in sodium cacodylate at 4°C. The tissue was then washed in distilled water, dehydrated through a series of increasing concentrations of ethanol, transferred from pure ethanol to propylene oxide, and embedded in Araldite.

Silver thin sections were doubly stained with uranyl acetate and lead citrate, and micrographed with a Zeiss EM-9S2 electron microscope.

#### *Na<sup>+</sup>/K<sup>+</sup>-ATPase activity determinations*

50  $\mu$ l samples of the P-2 fraction suspension described above were transferred to glass tubes containing 200  $\mu$ l of the following reaction mixture (in mmol l<sup>-1</sup>): Tris-HCl buffer (pH 7.4), 30; MgCl<sub>2</sub>, 6; NaCl, 120; KCl, 20; ouabain, 0.1. A parallel series of samples did not receive ouabain in order to measure total ATPase activity. All samples were preincubated for 30 min at 37°C in a Dubnoff shaker before the reaction was triggered by addition of 3 mmol l<sup>-1</sup> ATP. The reaction was allowed to proceed for 10 min and then stopped with 20  $\mu$ l of cold 50% trichloroacetic acid. The samples were finally centrifuged for 5 min at 600 g, and inorganic phosphate in the supernatant was determined spectrophotometrically according to the method of Hosie (1965). All data shown here correspond to the ouabain-sensitive fraction of the total ATPase activity. The effect of serotonin was assessed in the presence of 10<sup>-4</sup> mol l<sup>-1</sup> pargyline, a monoamine oxidase inhibitor found to have no effect on Na<sup>+</sup>/K<sup>+</sup>-ATPase activity at this concentration in previous tests. All compounds tested were added to the reaction mixture during the 30 min preincubation period.

## Results

### *Experiments with isolated eyes*

Fig. 1 shows the observed positions of the proximal screening pigment in the crayfish retina when isolated eyes were exposed to light and darkness in the presence or absence of 10<sup>-3</sup> mol l<sup>-1</sup> serotonin. Incubation in either medium was started at time zero. The eyes were incubated for up to 90 min under continuous illumination, then transferred to darkness for up to 60 min, and finally exposed again to light for an additional hour. The eyes incubated in the presence of serotonin showed a partial aggregation of the pigment to the dark-adapted position after 15 min in the light, and this distribution was kept for as long as illumination was maintained in our experiments. The extent and rate of this movement correspond with those of the first phase of the normal migration to the dark-adapted position (Frixione *et al.* 1979). When illumination was interrupted, the pigment retreated to the extreme dark-adapted position. Eyes incubated in the presence of serotonin usually presented a more complete dark-adaptation than the controls, as judged both quantitatively by the values of the pigment index, and qualitatively by a 'cleaner' appearance of the region of the retina deserted by the pigment mass. With the onset of a further period of illumination, fully dark-adapted eyes showed a rapid pigment dispersion towards the light-adapted position. However, in the serotonin-treated eyes this movement did not proceed to completion as it did in the controls. Therefore, serotonin at this concentration exerted a dark-adapting influence over the pigment position for any of the illumination conditions tested. Lower concentrations of serotonin produced a less

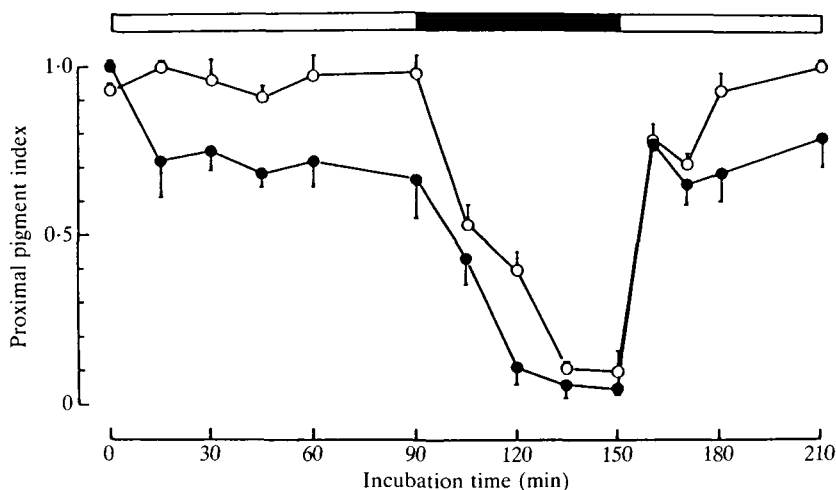

Fig. 1. Positions of the proximal screening pigment of crayfish eyes incubated with (●) or without (○)  $10^{-3}$  mol l $^{-1}$  serotonin under fluorescent laboratory light (white bar) and in darkness (black bar). Incubation in either medium started at time zero. Serotonin-treated eyes showed consistently lower values of proximal pigment index, revealing a dark-adapting influence of the amine under either illumination condition. Each point represents an average of at least four eyes, with standard deviation of the mean depicted by vertical lines.

consistent but still perceptible facilitation of pigment retraction (at  $10^{-4}$  mol l $^{-1}$ ) or did not affect pigment behaviour (at  $10^{-5}$  mol l $^{-1}$  or lower).

Several classical agonists and antagonists of serotonin (see Hong *et al.* 1969; Grahame-Smith, 1971; Peroutka *et al.* 1981) were also tested for their effects on screening-pigment migration. The agonists quipazine and 5-methoxy-*N,N*-dimethyltryptamine (5-MDT) accelerated dark-adaptation during the second phase of the movement, although not with the same efficacy as serotonin (Fig. 2). Pigment dispersion elicited by illumination was not affected by 5-MDT, but a clear partial inhibition of this movement was observed with quipazine (Fig. 3). Statistical analysis of the data using Student's *t*-test revealed that the difference between quipazine-treated eyes and the controls after 30 min of illumination was significant at the  $P < 0.001$  level. The serotonin antagonists methysergide and cyproheptadine cancelled the dark-adapting influence of serotonin over pigment movements in either direction (Figs 4 and 5). Incubation of the eyes in saline containing the antagonists alone did not produce a noticeable effect.

#### *Determinations of Na<sup>+</sup>/K<sup>+</sup>-ATPase activity on retinal membranes*

Electron microscopy of the P-2 fraction used for ATPase determinations revealed a rather uniform field of vesiculated smooth membranes, which included onion-like multilamellar bodies but very few pigment granules and virtually no cytoskeletal elements (Fig. 6). These materials probably derive from all the cells contained in the photoreceptor layer of the compound eye, including tapetum cells

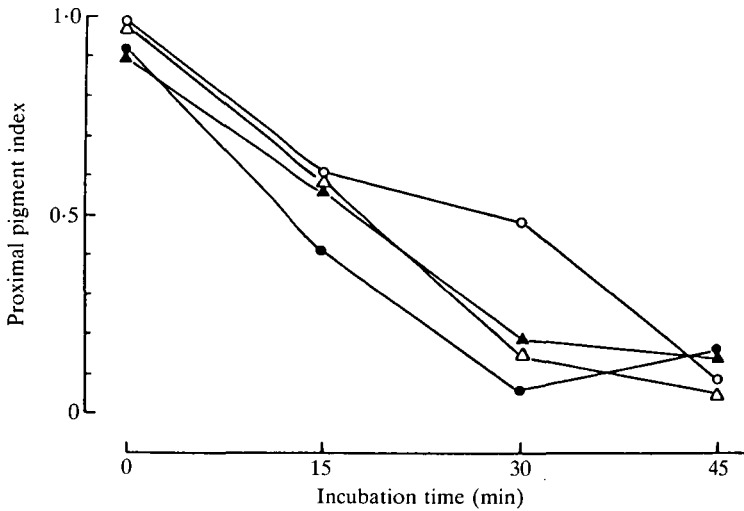

Fig. 2. Effect of serotonin and agonists upon pigment migration to the dark-adapted position in crayfish photoreceptors. Light-adapted eyes were incubated in the dark for the specified periods after time zero, in saline prepared with or without the compounds. Dark adaptation in the presence of serotonin (●), quipazine (▲) or 5-methoxy-*N,N*-dimethyltryptamine (Δ) was completed after only 30 min, when control preparations (○) were still midway through the normal course of migration. All drugs were at a final concentration of  $10^{-3}$  mol l $^{-1}$ . Each point represents an average of at least four eyes.

and haemocytes. Unfortunately, isolation of a relatively pure fraction from intact photoreceptors is not feasible at present because all attempts to dissociate the retinal tissue with trypsin, papain, low- $\text{Ca}^{2+}$  medium and other treatments have so far been unsuccessful. Therefore, whole photoreceptor layers, carefully dissected free from adjoining structures, such as the main bodies of the crystalline cones and the first optic ganglion, were used as a source of membranes for  $\text{Na}^+/\text{K}^+$ -ATPase activity determinations. Although this technical limitation imposes some reservations with regard to the exact location of the enzyme, a simple inspection of the histology of the crayfish retina (see Krebs, 1972; Nässel, 1976) shows that the photoreceptors constitute most of the volume in this region of the compound eye. Accordingly, we believe that the observed activity resides predominantly, if not exclusively, in membranes from the photoreceptor cells.

The basal  $\text{Na}^+/\text{K}^+$ -ATPase activity (EC 3.6.1.3) of the P-2 fraction, in the absence of serotonin or related compounds, was  $1.9 \pm 0.19 \mu\text{mol Pi mg protein}^{-1} \text{ h}^{-1}$ . The effect of serotonin on the basal activity was tested over a concentration range of  $10^{-9}$ – $10^{-3}$  mol l $^{-1}$  (Fig. 7). Activity was stimulated by 15% at  $10^{-8}$  mol l $^{-1}$  serotonin and increased almost sigmoidally with the logarithm of the amine concentration up to nearly 100% at  $10^{-3}$  mol l $^{-1}$ . A single but significant deviation occurred at  $10^{-7}$  mol l $^{-1}$ , which produced a stimulation of 45% over basal activity. The stimulation of  $\text{Na}^+/\text{K}^+$ -ATPase activity by serotonin was

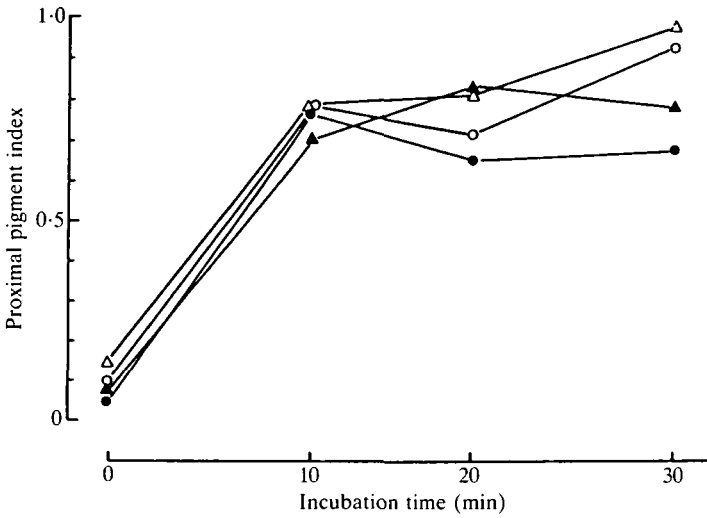

Fig. 3. Effect of serotonin and agonists upon pigment migration to the light-adapted position in crayfish photoreceptors. Dark-adapted eyes were exposed to light for the specified periods after time zero, in saline prepared with or without the compounds (all at  $10^{-3} \text{ mol l}^{-1}$ ). Serotonin (●) and quipazine (▲) prevented the full pigment dispersion normally observed after 30 min of illumination in a control preparation (○); 5-MDT (△) did not affect this movement. Each point represents an average of at least four eyes.

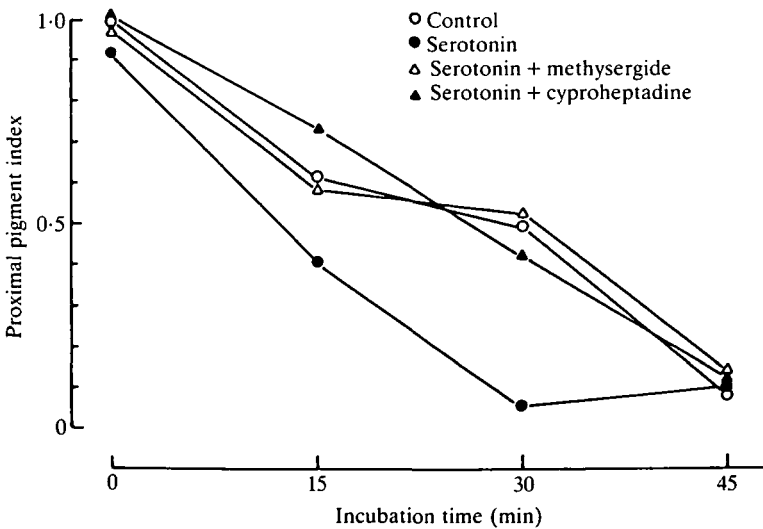

Fig. 4. Facilitation of pigment migration to the dark-adapted position by serotonin (●,  $10^{-3} \text{ mol l}^{-1}$ ) is cancelled by the antagonists methysergide (△,  $5 \times 10^{-3} \text{ mol l}^{-1}$ ) and cyproheptadine (▲,  $10^{-3} \text{ mol l}^{-1}$ ). Each point represents an average of at least four eyes.

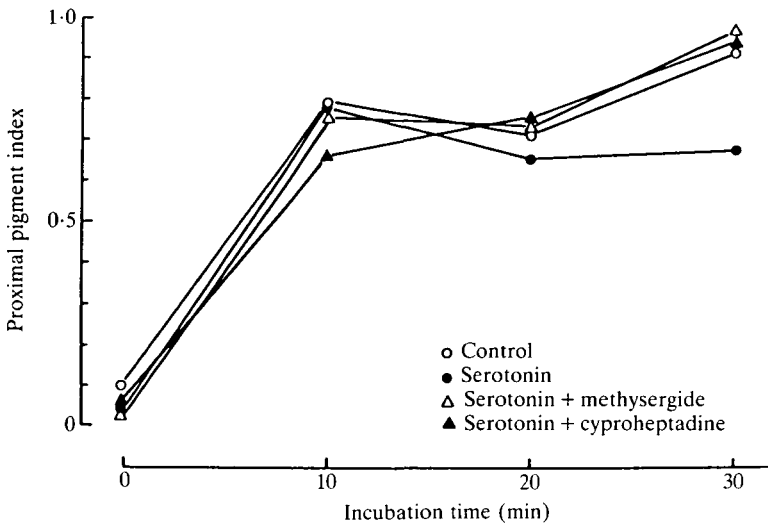

Fig. 5. Inhibition of pigment migration to the light-adapted position by serotonin (●,  $10^{-3}$  mol l $^{-1}$ ) is cancelled by the antagonists methysergide (△,  $5 \times 10^{-3}$  mol l $^{-1}$ ) and cyproheptadine (▲,  $10^{-3}$  mol l $^{-1}$ ). Each point represents an average of at least four eyes.

significant ( $P < 0.05$  at  $10^{-8}$  mol l $^{-1}$  and  $P < 0.01$  at the higher concentrations) compared with the controls (Student's *t*-test). Quipazine had a considerably stronger stimulatory effect than serotonin:  $10^{-9}$  mol l $^{-1}$  of the agonist enhanced the basal Na $^{+}$ /K $^{+}$ -ATPase activity by an amount equivalent to that to be expected for a serotonin concentration of  $5 \times 10^{-5}$  mol l $^{-1}$  (Fig. 8). Methysergide, added simultaneously at concentrations from  $10^{-9}$  to  $10^{-5}$  mol l $^{-1}$ , abolished the stimulatory effect of  $10^{-3}$  mol l $^{-1}$  serotonin or  $10^{-7}$  mol l $^{-1}$  quipazine.

## Discussion

### *Serotonergic modulation of pigment position*

The results described above show that serotonin induces a tendency for the screening pigment to retract to the dark-adapted position in crayfish photoreceptors. The PPI values were consistently lower in eyes exposed to serotonin or its agonists, either in the light or in darkness, and this effect was abolished by serotonin antagonists. These findings agree with the suggestion of a serotonergic modulation of pigment position in crustaceans (see Introduction). Therefore, a possible role of serotonin in the control of pigment position deserves careful consideration.

An interesting finding is that serotonin affected pigment position only at a concentration considerably higher than those effective on many other crustacean tissues *in vitro* (Beltz & Kravitz, 1986). The concentration of serotonin found clearly effective in our incubation bath is also greater than those that occur in



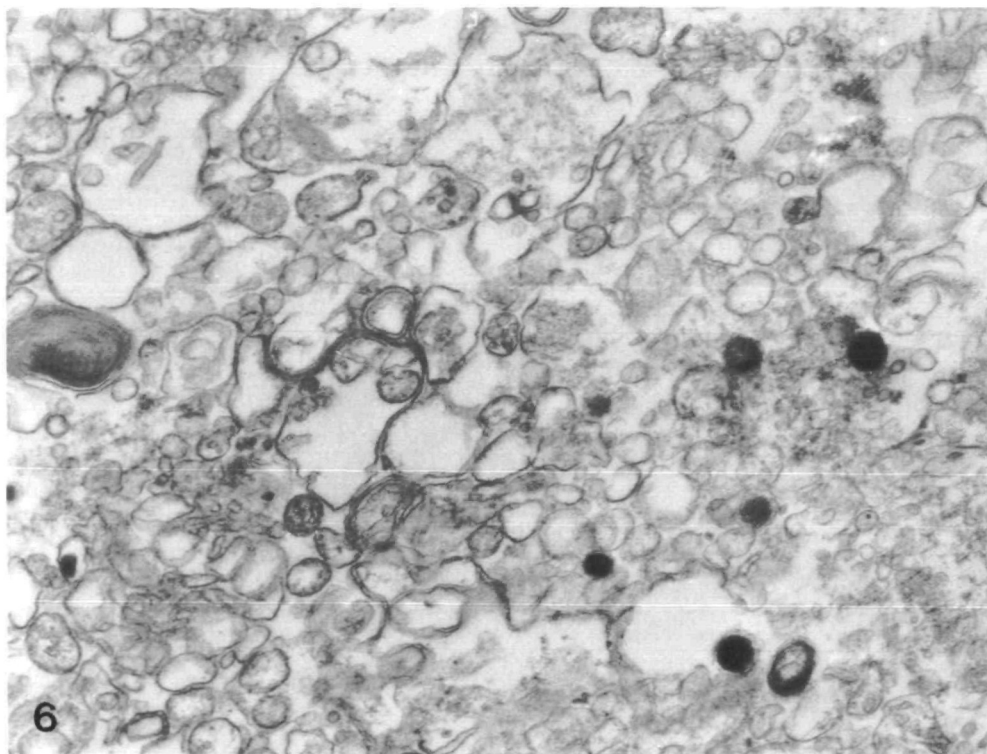

Fig. 6. Electron micrograph of the P-2 fraction of retinal homogenates used for ATPase determinations. The fraction appears to be composed of smooth-membraned vesicles of diverse sizes. Pigment granules were scarce in this material.  $\times 32\,000$ .

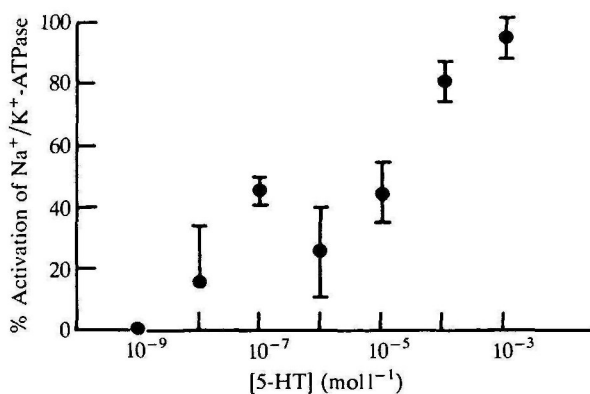

Fig. 7. Serotonin (5-HT) stimulation of Na<sup>+</sup>/K<sup>+</sup>-ATPase activity in the P-2 fraction of retinal homogenates. Each point represents an average of at least four determinations, with standard deviation of the mean depicted by vertical lines.

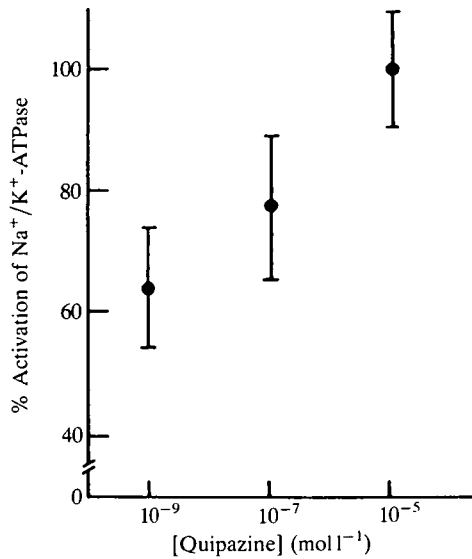

Fig. 8. Quipazine stimulation of  $\text{Na}^+/\text{K}^+$ -ATPase activity in the P-2 fraction of retinal homogenates. Each point represents an average of at least four determinations, with standard deviation of the mean depicted by vertical lines.

crayfish haemolymph (Elofsson *et al.* 1982). The relatively high levels of the amine required to produce an effect on the pigment could be explained by a limited diffusion of compounds from the bath to the photoreceptor layer inside the eyestalk, a limitation that would not occur with the eye *in situ*, where an efficient distribution of blood-borne metabolites is ensured by an intact vascular system. This argument is probably correct to some extent, because even small ions are subject to some restraint on inward and outward movements in perfused nervous tissues of crustaceans (Abbott *et al.* 1975). Also, drugs such as ouabain have to be used at high concentrations *in vitro* to affect crustacean photoreceptors (Stieve *et al.* 1977; Frixione & Aréchiga, 1981). Yet, the rapid effect of serotonin upon pigment position (Fig. 1) is an indication that diffusion barriers in the ocular tissue are not particularly restrictive for this amine. From our experience with this system, it is not unreasonable to assume a 5- to 10-fold difference in the concentration of serotonin between the bath and the interstitial fluid inside the retina. Since some effect was still observed with  $10^{-4} \text{ mol l}^{-1}$  serotonin, we believe the substance is able to produce a pigment response within a concentration range of  $10^{-5}$ – $10^{-4} \text{ mol l}^{-1}$ . These levels of serotonin are comparable to those required to cause changes in the firing pattern of motoneurons of the lobster nerve cord (Harris-Warrick & Kravitz, 1984).

Since a relatively high concentration of serotonin is indeed necessary to influence pigment position, the levels circulating in the bloodstream are hardly sufficient to promote circadian migrations. However, concentrations much higher than these could probably build up near the plasma membrane of the photorecep

tors if the amine were acting as a locally delivered neuromodulator. The presence of efferent serotonergic fibres reaching the photoreceptors has recently been shown immunochemically in crayfish eyes (H. Aréchiga, E. Banuelos, E. Frixione, A. Picones & L. Rodríguez-Sosa, unpublished results). Similar neurones have also been found in the lamina of the blowfly optic lobe, where they are thought to exert a centrifugal influence over the photoreceptors in large portions of the visual field (Nässel *et al.* 1983). Part of this influence could be the activation of structural transformations involved in adaptation, including pigment migration, as suggested for octopamine in *Limulus* lateral eyes (Kass & Barlow, 1984). Evidence of serotonergic modulation exists also for the eye of *Aplysia* (Nadaka-vukaren *et al.* 1986) and for the retina of teleost fish (Dearry & Burnside, 1986).

#### *Serotonergic modulation of $\text{Na}^+/\text{K}^+$ -ATPase activity*

Our experiments with the P-2 pellet of retinal homogenate demonstrate that serotonin is able to stimulate the  $\text{Na}^+/\text{K}^+$ -ATPase activity present in a cellular fraction composed almost entirely of membranes. Similar results at equivalent serotonin concentrations have been reported for synaptosomal preparations obtained from mammalian brain (Logan & O'Donovan, 1976; Lee & Phillis, 1977). Our findings add to a growing body of evidence for a modulatory action of serotonin and other neurotransmitters on the  $\text{Na}^+/\text{K}^+$ -ATPase of nerve cells (Yoshimura, 1973; Logan & O'Donovan, 1980; Rodríguez de Lores Arnaiz & Antonelli de Gómez de Lima, 1981, 1983; Hernández, 1979; Hernández & Chagoya, 1986). Although it is premature to discuss the possible effect of serotonin at the molecular level in this system, it is nevertheless pertinent to point out that the high sensitivity to quipazine, as well as the abolition of the serotonergic effect on enzyme activity by methysergide, suggest an effect mediated by a specific receptor – perhaps of the 5-HT<sub>1</sub> type – as proposed in view of a similar pharmacological profile for synaptosomal membranes from rat brain (Hernández, 1980, 1982, 1987).

#### *Involvement of serotonin and $\text{Na}^+/\text{K}^+$ -ATPase activity in the control of screening-pigment position*

It is now well established that the vectorial transport of intracellular components is keenly dependent upon the ionic balance in the cytoplasm. In particular, the internal levels of  $\text{Ca}^{2+}$  seem to play a prominent role in the regulation of pigment granule movements in arthropod photoreceptors (Kirschfeld & Vogt, 1980; Frixione & Aréchiga, 1981) and chromatophores (Luby-Phelps & Porter, 1982), as well as in axoplasmic transport (Ochs, 1982). In turn, the regulation of cytoplasmic  $\text{Ca}^{2+}$  concentration appears to be sensitive to the  $\text{Na}^+$  levels inside some of these cells. Evidence for a  $\text{Na}^+$ -dependent modulation of internal  $\text{Ca}^{2+}$  levels exists in the case of invertebrate photoreceptors (Waloga *et al.* 1975; Bader *et al.* 1976). A  $\text{Na}^+$ -elicited  $\text{Ca}^{2+}$  release from intracellular stores has been proposed as a likely mechanism for the coupling of light adaptation with pigment dispersion in crayfish photoreceptors (Frixione & Aréchiga, 1981) and for the  $\text{Na}^+$ -sensitivity of

axoplasmic transport in batrachotoxin-treated nerves (Worth & Ochs, 1982). The main  $\text{Ca}^{2+}$  stores have been identified as smooth endoplasmic reticulum in several photoreceptors (Perrelet & Bader, 1978; Walz, 1979, 1982*b*; Ungar *et al.* 1984; Coles & Rick, 1985; Somlyo & Walz, 1985) and in other nerve cells (Duce & Keen, 1978; Chan *et al.* 1984; Burton & Laveri, 1985). An inhibitory influence of  $\text{Na}^+$  over the  $\text{Ca}^{2+}$  storing ability of the smooth endoplasmic reticulum has been shown in photoreceptors of leech (Walz, 1982*a*) and crayfish (Frixione & Ruiz, 1988). It is thus conceivable that any stimulus producing fluctuations in the levels of internal  $\text{Na}^+$  could affect pigment position in arthropod photoreceptors through modulations of internal  $\text{Ca}^{2+}$  level.

Within this conceptual framework, enhancement of  $\text{Na}^+/\text{K}^+$ -ATPase activity – and thus  $\text{Na}^+$  extrusion through the plasma membrane – by serotonin would be expected to decrease the levels of  $\text{Na}^+$ , and therefore of  $\text{Ca}^{2+}$ , in the cytoplasm of crayfish photoreceptors, with a consequent facilitation of pigment aggregation to the dark-adapted position. Nocturnal activation of a serotonergic efferent input to the photoreceptors, probably driven by the same circadian oscillator that increases serotonin levels in the eyestalks of some crustaceans after dusk (Fingerman & Fingerman, 1977), would favour a more complete dark-adapted position of the pigment at night, even under constant darkness, as discovered by Bennitt (1932). Demonstration of a circadian efferent input mediated by serotonin over the photoreceptors of crayfish is obviously necessary for any further exploration of this hypothesis.

The authors are indebted to Dr Hugo Aréchiga for his valuable suggestions after a critical reading of the first manuscript. Gratitude is expressed also to Ofelia Pérez-Olvera, Graciela Chagoya and Ignacio Vargas for their competent technical assistance. The microscopy studies were made at the Unidad de Microscopia Electrónica (CINVESTAV). This work was supported in part by the research grant PCCBBAU-021031 provided by the CONACYT (Mexico).

### References

- ABBOTT, N. J., MORETON, R. B. & PICHON, Y. (1975). Electrophysiological analysis of potassium and sodium movements in crustacean nervous system. *J. exp. Biol.* **63**, 85–115.
- BADER, C. R., BAUMANN, F. & BERTRAND, D. (1976). Role of intracellular calcium and sodium in light-adaptation in the retina of the honey bee drone (*Apis mellifera* L.). *J. gen. Physiol.* **67**, 475–491.
- BARLOW, R. B., CHAMBERLAIN, S. C. & KAPLAN, E. (1977). Efferent inputs and serotonin enhance the sensitivity of the *Limulus* lateral eye. *Biol. Bull. mar. biol. Lab., Woods Hole* **153**, 414.
- BELTZ, B. S. & KRAVITZ, E. A. (1986). Aminergic and peptidergic neuromodulation in crustacea. *J. exp. Biol.* **124**, 115–141.
- BENNITT, R. (1932). Diurnal rhythm in the proximal cells of the crayfish retina. *Physiol. Zool.* **5**, 65–69.
- BURTON, P. & LAVERI, L. A. (1985). The distribution, relationships to other organelles, and calcium-sequestering ability of smooth endoplasmic reticulum in frog olfactory axons. *J. Neurosci.* **5**, 3047–3060. ■

- CHAN, S.-Y., OCHS, S. & JERSILD, R. A. (1984). Localization of calcium in nerve fibers. *J. Neurobiol.* **15**, 89–108.
- COLES, J. A. & RICK, R. (1985). An electron microprobe analysis of photoreceptors and outer pigment cells in the retina of the honeybee drone. *J. comp. Physiol.* **156A**, 213–222.
- DEARRY, A. & BURNSIDE, B. (1986). Dopaminergic regulation of cone retinomotor movement in isolated teleost retinas: II. Modulation by  $\gamma$ -aminobutyric acid and serotonin. *J. Neurochem.* **46**, 1022–1031.
- DUCE, I. R. & KEEN, P. (1978). Can neuronal smooth endoplasmic reticulum function as a calcium reservoir? *Neuroscience* **3**, 837–848.
- ELOFSSON, R. (1983). 5-HT-like immunoreactivity in the central nervous system of the crayfish, *Pacifastacus leniusculus*. *Cell Tiss. Res.* **232**, 221–236.
- ELOFSSON, R., LAXMYR, L., ROSENGREN, E. & HANSSON, C. (1982). Identification and quantitative measurements of biogenic amines and dopa in the central nervous system and haemolymph of the crayfish *Pacifastacus leniusculus* (Crustacea). *Comp. Biochem. Physiol.* **71C**, 195–201.
- FINGERMAN, S. W. & FINGERMAN, M. (1977). Circadian variation in the levels of red pigment-dispersing hormone and 5-hydroxytryptamine in the eyestalks of the fiddler crab, *Uca pugilator*. *Comp. Biochem. Physiol.* **56C**, 5–8.
- FRIXIONE, E. (1983a). The microtubular system of the crayfish retinula cells and its changes in relation to screening pigment migration. *Cell Tiss. Res.* **232**, 335–348.
- FRIXIONE, E. (1983b). Firm structural associations of migratory pigment granules with microtubules in crayfish retinula cells. *J. Cell Biol.* **96**, 1258–1265.
- FRIXIONE, E. & ARÉCHIGA, H. (1981). Ionic dependence of screening pigment migrations in crayfish retinal photoreceptors. *J. comp. Physiol.* **144A**, 35–43.
- FRIXIONE, E., ARÉCHIGA, H. & TSUTSUMI, V. (1979). Photomechanical migrations of pigment granules along the retinula cells of the crayfish. *J. Neurobiol.* **10**, 573–590.
- FRIXIONE, E. & RUIZ, L. (1988). Calcium uptake by smooth endoplasmic reticulum of peeled retinal photoreceptors of the crayfish. *J. comp. Physiol.* **162A**, 91–100.
- GRAHAME-SMITH, D. G. (1971). Inhibitory effects of chlorpromazine on the syndrome of hyperactivity produced by L-tryptophan or 5-methoxy-N,N-dimethyltryptamine in rats treated with a monoamine oxidase inhibitor. *Br. J. Pharmac.* **43**, 856.
- HARRIS-WARRICK, R. & KRAVITZ, E. A. (1984). Cellular mechanisms for modulation of posture by octopamine and serotonin in the lobster. *J. Neurosci.* **4**, 1976–1993.
- HERNÁNDEZ, R. J. (1979). ( $\text{Na}^+$ ,  $\text{K}^+$ )ATPase activity in the brain cortex of rats ontogenetically malnourished and treated with serotonin precursors. *Brain Res.* **162**, 348–352.
- HERNÁNDEZ, R. J. (1980). Effects of malnutrition and quipazine on rat cerebral cortex ATPase activity during development. *Devl Neurosci.* **3**, 272–282.
- HERNÁNDEZ, R. J. (1982). A serotonin agonist–antagonist reversible effect on  $\text{Na}^+$ - $\text{K}^+$ -ATPase activity in the developing and adult rat brain. *Devl Neurosci.* **5**, 326–331.
- HERNÁNDEZ, R. J. (1987). Brain ( $\text{Na}^+$ ,  $\text{K}^+$ )ATPase activity possibly regulated by a specific serotonin receptor. *Brain Res.* **408**, 399–402.
- HERNÁNDEZ, R. J. & CHAGOYA, G. (1986). Brain serotonin synthesis and ( $\text{Na}^+$ ,  $\text{K}^+$ )ATPase activity are increased postnatally after prenatal administration of L-tryptophan. *Devl Brain Res.* **25**, 221–226.
- HONG, E., SANCILIO, L. F., VARGAS, R. & PARDO, E. G. (1969). Similarities between the pharmacological actions of quipazine and serotonin. *Eur. J. Pharmac.* **6**, 274–280.
- HOSIE, R. J. A. (1965). The localization of adenosine triphosphatases in morphologically characterized subcellular fractions of guinea pig brain. *Biochem. J.* **96**, 404–412.
- KASS, L. & BARLOW, R. B., JR (1984). Efferent neurotransmission of circadian rhythms in the *Limulus* lateral eye. I. Octopamine-induced increases in retinal sensitivity. *J. Neurosci.* **4**, 908–917.
- KIRSCHFELD, K. & VOGT, K. (1980). Calcium ions and pigment migration in fly photoreceptors. *Naturwissenschaften* **67**, 516–517.
- KREBS, W. (1972). The fine structure of the retinula of the compound eye of *Astacus fluviatilis*. *Z. Zellforsch. mikrosk. Anat.* **133**, 399–414.
- LEE, S. L. & PHILLIS, J. W. (1977). Stimulation of cerebral cortical synaptosomal Na-K-ATPase by biogenic amines. *Can. J. Physiol. Pharmac.* **55**, 961–964.

- LOGAN, J. G. & O'DONOVAN, D. J. (1976). The effects of ouabain and the activation of neuronal membrane ATPase by biogenic amines. *J. Neurochem.* **27**, 185–189.
- LOGAN, J. G. & O'DONOVAN, D. J. (1980). The effect of desipramine on the noradrenaline stimulated Na-K ATPase of rabbit synaptic membranes. *Biochem. Pharmac.* **29**, 111–112.
- LOWRY, O. H., ROSEBROUGH, N. J., FARR, A. L. & RANDALL, R. J. (1951). Protein measurement with the Folin phenol reagent. *Biol. Chem.* **193**, 265–275.
- LUBY-PHELPS, K. & PORTER, K. R. (1982). The control of pigment migration in isolated erythrocytes of *Holocentrus ascensionis* (Osbeck). II. The role of calcium. *Cell* **29**, 441–450.
- MILLER, W. H. (1975). Mechanisms of photomechanical movement. In *Photoreceptor Optics* (ed. A. W. Snyder & R. Menzel), pp. 415–428. Berlin, Heidelberg, New York: Springer-Verlag.
- MILLER, W. H. (1979). Intraocular filters. In *Handbook of Sensory Physiology*, vol. VII/6A (ed. H. Autrum), pp. 69–143. Berlin, Heidelberg, New York: Springer-Verlag.
- NADAKAVUKAREN, J. J., LICKEY, M. E. & JORDAN, W. P. (1986). Regulation of the circadian clock in the *Aplysia* eye: mimicry of neural action by serotonin. *J. Neurosci.* **6**, 14–21.
- NÄSSEL, D. R. (1976). The retina and retinal projections on the lamina ganglionaris of the crayfish *Pacifastacus leniusculus* (Dana). *J. comp. Neurol.* **167**, 341–360.
- NÄSSEL, D. R., HAGBERG, M. & SEYAN, H. S. (1983). A new, possibly serotonergic, neuron in the lamina of the blowfly optic lobe: an immunocytochemical and Golgi-EM study. *Brain Res.* **280**, 361–367.
- OCHS, S. (1982). Calcium and the mechanism of axoplasmic-transport. *Fedn Proc. Fedn Am. Socs exp. Biol.* **41**, 2301–2306.
- OLIVO, R. F. & LARSEN, M. E. (1978). Brief exposure to light initiates screening pigment migration in the retinula cells of the crayfish *Procambarus*. *J. comp. Physiol.* **125A**, 91–96.
- PARKER, G. H. (1932). The movements of the retinal pigment. *Ergeb. Biol.* **9**, 239–291.
- PEROUTKA, S. J., LEBOVITZ, R. M. & SNYDER, S. H. (1981). Two distinct central serotonin receptors with different physiological function. *Science* **212**, 827–829.
- PERRELET, A. L. & BADER, C.-R. (1978). Morphological evidence for  $Ca^{++}$  stores in the retina of honeybee drones. *J. Ultrastruct. Res.* **63**, 237–243.
- RAO, K. R. (1985). Pigmentary effectors. In *The Biology of Crustacea*, vol. 9 (ed. D. E. Bliss & L. H. Mantel), pp. 395–462. New York, London: Academic Press.
- RODRÍGUEZ DE LORES ARNAIZ, G. & ANTONELLI DE GÓMEZ DE LIMA, M. (1981). The effect of several neurotransmitter substances on nerve ending membrane ATPase. *Acta physiol. Latinoam.* **31**, 39–44.
- RODRÍGUEZ DE LORES ARNAIZ, G. & ANTONELLI DE GÓMEZ DE LIMA, M. (1983). The effects of dopamine on  $Na^{+}$ - $K^{+}$ -ATPase activity in nerve ending membranes are prevented by *N*-ethylmaleimide. *Neurochem. Int.* **5**, 117–124.
- SÁNCHEZ, J. A. & FUENTES-PARDO, B. (1977). Circadian rhythm in the amplitude of the electroretinogram in the isolated eyestalk of the crayfish. *Comp. Biochem. Physiol.* **56A**, 601–605.
- SOMLYO, A. P. & WALZ, B. (1985). Elemental distribution in *Rana pipiens* retinal rods: quantitative electron probe analysis. *J. Physiol., Lond.* **358**, 183–196.
- STAVENGA, D. G. (1979). Pseudopupils of compound eyes. In *Handbook of Sensory Physiology*, vol. VII/6A (ed. H. Autrum), pp. 357–439. Berlin, Heidelberg, New York: Springer-Verlag.
- STIEVE, H., BRUNS, M. & GAUBE, H. (1977). Ability to light-induced conductance change of arthropod visual cell membrane, indirectly depending on membrane potential, during depolarization by external potassium or ouabain. *Z. Naturforsch.* **32a**, 855–869.
- UNGAR, F., PISCOPO, I., LETIZIA, J. & HOLTZMAN, E. (1984). Uptake of calcium by the endoplasmic reticulum of the frog photoreceptor. *J. Cell Biol.* **98**, 1645–1655.
- VAN HARREVELD, A. (1936). A physiological solution for fresh-water crustaceans. *Proc. Soc. exp. Biol. Med.* **34**, 428–432.
- WALOGA, G., BROWN, J. E. & PINTO, L. H. (1975). Detection of changes of  $Ca_{in}$  from *Limulus* ventral photoreceptors using arsenazo III. *Biol. Bull. mar. biol. Lab., Woods Hole* **149**, 449–450.
- WALZ, B. (1979). Subcellular calcium localization and ATP-dependent  $Ca^{2+}$ -uptake by smooth endoplasmic reticulum in an invertebrate photoreceptor cell. Ultrastructural, cytochemical, and X-ray microanalytical study. *Eur. J. Cell Biol.* **20**, 83–91.

- WALZ, B. (1982a).  $\text{Ca}^{2+}$ -sequestering smooth endoplasmic reticulum in an invertebrate photoreceptor. II. Its properties as revealed by microphotometric measurements. *J. Cell Biol.* **93**, 849–859.
- WALZ, B. (1982b). Calcium-sequestering smooth endoplasmic reticulum in retinula cells of the blowfly. *J. Ultrastruct. Res.* **81**, 240–248.
- WORTH, R. M. & OCHS, S. (1982). Dependence of batrachotoxin block of axoplasmic-transport on sodium. *J. Neurobiol.* **13**, 537–549.
- YOSHIMURA, K. (1973). Activation of Na-K activated ATPase in rat brain by catecholamine. *J. Biochem., Tokyo* **74**, 389–391.
